# Supplementary material for: Clinicopathological significance of expression of p-c-Jun, TCF4 and beta-Catenin in colorectal tumors
Source: PubMed Central journal article supplement (PMC2585585; doi:10.1186/1471-2407-8-328), 2008-11-08
Supplement: 1471-2407-8-328-S1.pdf [file 1471-2407-8-328-S1.pdf]

# Additional file 1–Supplemental Table S1.

## Nuclear expression of p-c-Jun, TCF4, $\beta$ -Catenin and MMP7 in tumor compared with adjacent normal colorectal epithelia

| Tumor type | n  | p-c-Jun             |                     |         | TCF4                   |                       |        | $\beta$ -Catenin    |                       |          | MMP7                |                       |         |
|------------|----|---------------------|---------------------|---------|------------------------|-----------------------|--------|---------------------|-----------------------|----------|---------------------|-----------------------|---------|
|            |    | Normal              | Tumor               | $p$     | Normal                 | Tumor                 | $p$    | Normal              | Tumor                 | $p$      | Normal              | Tumor                 | $p$     |
| Adenoma    | 19 | 10<br>(20 $\pm$ 28) | 25<br>(45 $\pm$ 50) | 0.02*   | 70<br>(99 $\pm$ 79)    | 150<br>(136 $\pm$ 64) | 0.048* | 30<br>(29 $\pm$ 21) | 70<br>(75 $\pm$ 55)   | 0.002*   | 10<br>(22 $\pm$ 33) | 120<br>(112 $\pm$ 66) | 0.0004* |
| HGIN       | 14 | 0<br>(12 $\pm$ 21)  | 30<br>(33 $\pm$ 24) | 0.02*   | 104<br>(131 $\pm$ 104) | 180<br>(167 $\pm$ 69) | 0.2    | 35<br>(56 $\pm$ 57) | 103<br>(99 $\pm$ 59)  | 0.004*   | 25<br>(27 $\pm$ 31) | 95<br>(111 $\pm$ 68)  | 0.002*  |
| Carcinoma  | 35 | 1<br>(10 $\pm$ 31)  | 15<br>(21 $\pm$ 26) | 0.0006* | 150<br>(128 $\pm$ 86)  | 143<br>(133 $\pm$ 73) | 0.9    | 30<br>(33 $\pm$ 31) | 100<br>(116 $\pm$ 73) | <0.0001* | 0<br>(20 $\pm$ 26)  | 30<br>(51 $\pm$ 54)   | 0.001*  |

Data are expressed as immunohistochemistry (IHC) scores; median (mean  $\pm$  SD).

\* $p$  < 0.05 by Wilcoxon matched pairs signed ranks test.
