# Supplementary material for: Clinicopathological significance of expression of p-c-Jun, TCF4 and beta-Catenin in colorectal tumors
Source: PubMed Central journal article supplement (PMC2585585; doi:10.1186/1471-2407-8-328), 2008-11-08
Supplement: 1471-2407-8-328-S2.pdf [file 1471-2407-8-328-S2.pdf]

## Additional file 2–Supplemental Table S2

Correlation between staining intensity and percentage of positive cells (percentage score) in all colorectal tumors and adjacent normal epithelia (n = 68, respectively)

| Factor           | Tissue | rs   | p       |   |
|------------------|--------|------|---------|---|
| p-c-Jun          | Normal | 0.95 | <0.0001 | * |
| p-c-Jun          | Tumor  | 0.63 | <0.0001 | * |
| TCF4             | Normal | 0.78 | <0.0001 | * |
| TCF4             | Tumor  | 0.52 | <0.0001 | * |
| $\beta$ -Catenin | Normal | 0.81 | <0.0001 | * |
| $\beta$ -Catenin | Tumor  | 0.63 | <0.0001 | * |
| MMP7             | Normal | 0.89 | <0.0001 | * |
| MMP7             | Tumor  | 0.35 | 0.01    | * |

\*p < 0.05 by Spearman's rank correlation test.
