# Supplementary material for: Clinicopathological significance of expression of p-c-Jun, TCF4 and beta-Catenin in colorectal tumors
Source: PubMed Central journal article supplement (PMC2585585; doi:10.1186/1471-2407-8-328), 2008-11-08
Supplement: 1471-2407-8-328-S3.pdf [file 1471-2407-8-328-S3.pdf]

# Additional file 3 –Supplemental Table S3

Nuclear expression of p-c-Jun, TCF4,  $\beta$ -Catenin and MMP7 in tumor compared with adjacent normal colorectal epithelia by using percentage score

| Tumor type | n  | p-c-Jun                          |        | TCF4                             |        | $\beta$ -Catenin                 |          | MMP7                             |         |
|------------|----|----------------------------------|--------|----------------------------------|--------|----------------------------------|----------|----------------------------------|---------|
|            |    | Normal / Tumor                   | $\rho$ | Normal / Tumor                   | $\rho$ | Normal / Tumor                   | $\rho$   | Normal / Tumor                   | $\rho$  |
| Adenoma    | 19 | 10 / 20<br>(17 ± 19) / (26 ± 21) | 0.04*  | 60 / 75<br>(54 ± 32) / (69 ± 25) | 0.04*  | 30 / 60<br>(27 ± 18) / (54 ± 27) | 0.003*   | 10 / 50<br>(16 ± 21) / (47 ± 19) | 0.0006* |
| HGIN       | 14 | 0 / 25<br>(12 ± 21) / (25 ± 14)  | 0.02*  | 73 / 90<br>(61 ± 34) / (80 ± 20) | 0.04*  | 35 / 69<br>(43 ± 32) / (61 ± 24) | 0.01*    | 20 / 55<br>(20 ± 27) / (53 ± 24) | 0.002*  |
| Carcinoma  | 35 | 3 / 10<br>(8 ± 16) / (14 ± 16)   | 0.01*  | 85 / 90<br>(66 ± 36) / (76 ± 29) | 0.06   | 30 / 75<br>(30 ± 25) / (67 ± 26) | <0.0001* | 0 / 20<br>(19 ± 26) / (25 ± 23)  | 0.08    |

Data are expressed as percentage score; median (mean ± SD).

\*p < 0.05 by Wilcoxon matched pairs signed ranks test.
