# Supplementary material for: Clinicopathological significance of expression of p-c-Jun, TCF4 and beta-Catenin in colorectal tumors
Source: PubMed Central journal article supplement (PMC2585585; doi:10.1186/1471-2407-8-328), 2008-11-08
Supplement: 1471-2407-8-328-S4.pdf [file 1471-2407-8-328-S4.pdf]

p-c-Jun

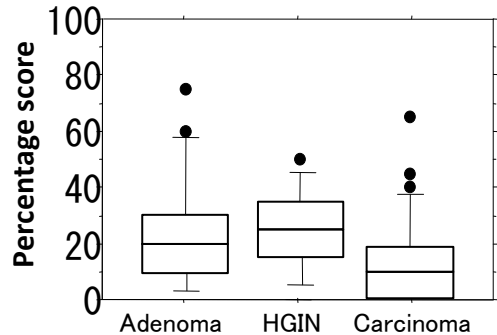 $p = 0.01$  \*

TCF4

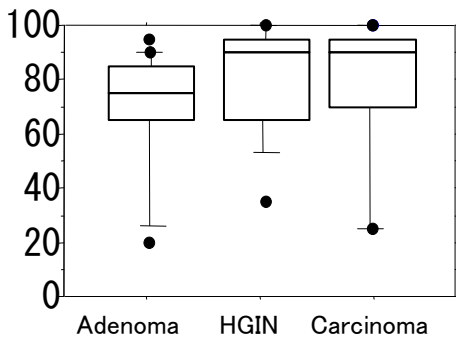 $p = 0.1$  $\beta$ -Catenin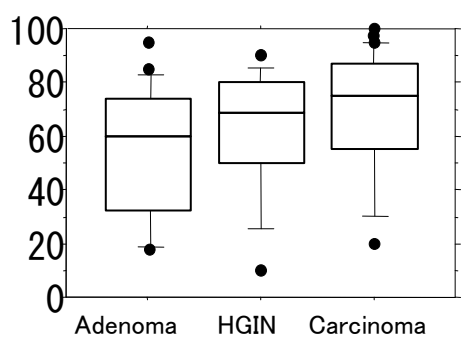 $p = 0.2$
