# Supplementary material for: Clinicopathological significance of expression of p-c-Jun, TCF4 and beta-Catenin in colorectal tumors
Source: PubMed Central journal article supplement (PMC2585585; doi:10.1186/1471-2407-8-328), 2008-11-08

(a)

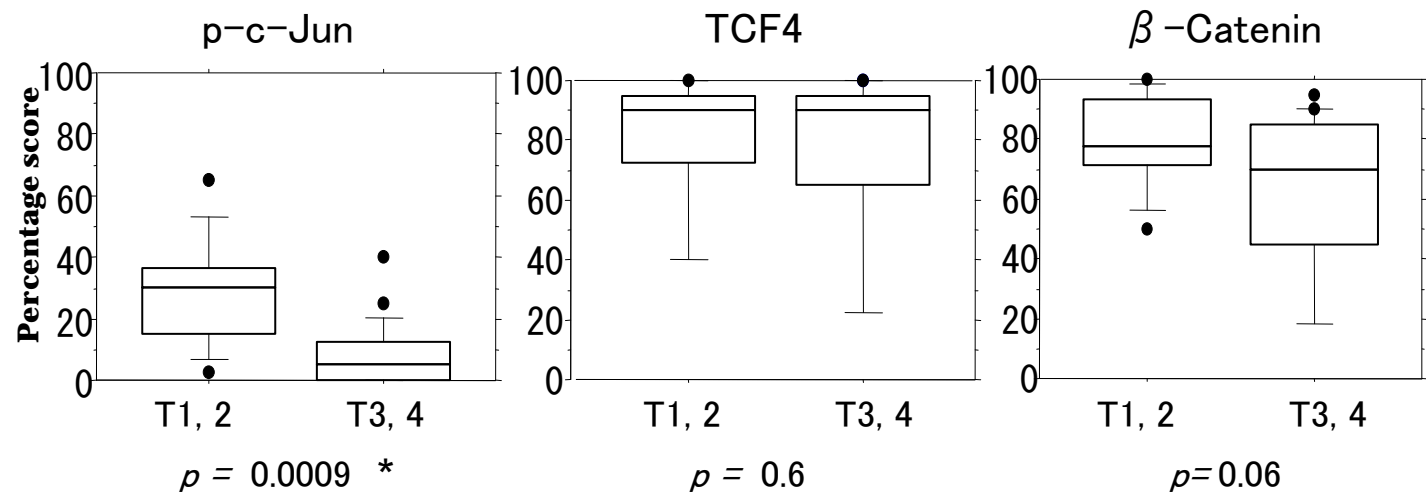

(b)

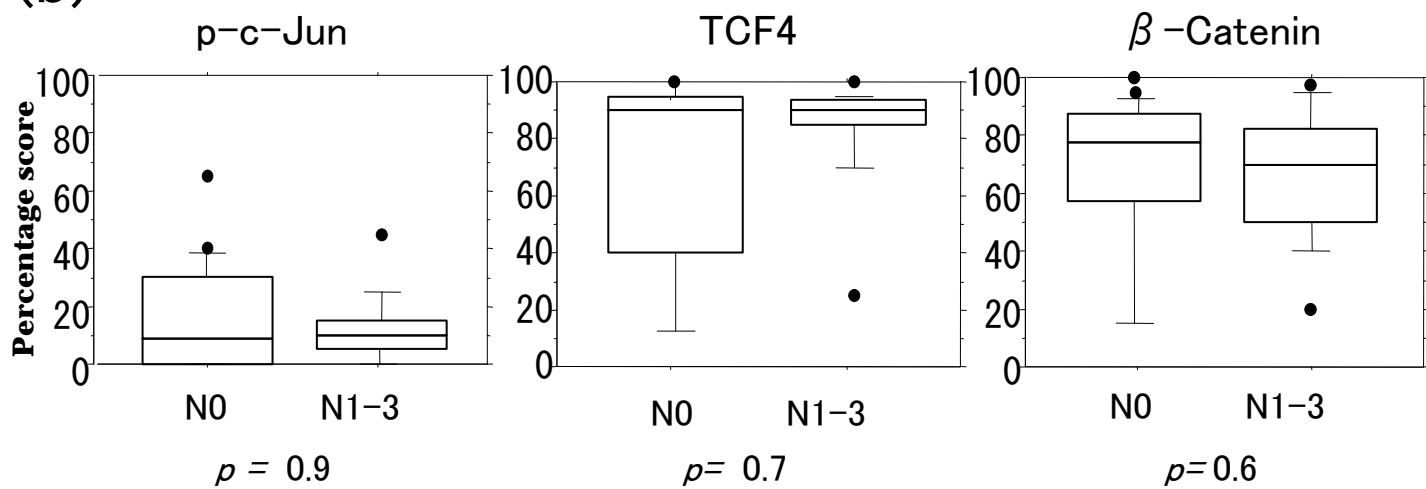

Supplement: 1471-2407-8-328-S5.pdf [file 1471-2407-8-328-S5.pdf]
